# Supplementary material for: Single-cell transcriptomics identifies senescence-associated secretory phenotype (SASP) features of testicular aging in human
Source: publisher site journal article supplement (doi:10.18632/aging.205538), 2024-02-12
Supplement: Supplementary file [file aging-v16i4-205538-supplementary-material-SD2.pdf]

**SUPPLEMENTARY TABLES**

**Supplementary Table 1. Patient information.**

| <b>Name</b>  | <b>Age</b> | <b>Data</b> | <b>Old_name</b> |
|--------------|------------|-------------|-----------------|
| <b>Young</b> |            |             |                 |
| Young_1      | 17         | GSE120508   | Donor_1_rep2    |
| Young_2      | 24         | GSE120508   | Donor_2_rep1    |
| Young_3      | 24         | GSE120508   | Donor_2_rep2    |
| Young_4      | 25         | GSE120508   | Donor_3_rep1    |
| Young_5      | 25         | GSE120508   | Donor_3_rep2    |
| Young_6      | 26         | GSE215754   | Y1              |
| Young_7      | 56         | GSE215754   | HA1             |
| Young_8      | 31         | GSE153947   | Normal_1        |
| Young_9      | 33         | GSE153947   | Normal_2        |
| Young_10     | 55         | GSE153947   | Normal_3        |
| Young_11     | 17-22      | GSE182786   | Young_1         |
| Young_12     | 17-22      | GSE182786   | Young_2         |
| Young_13     | 17-22      | GSE182786   | Young_3         |
| Young_14     | 17-22      | GSE182786   | Young_4         |
| <b>Old</b>   |            |             |                 |
| Old_1        | 67         | GSE215754   | HA2             |
| Old_2        | >60        | GSE182786   | Older_1         |
| Old_3        | >60        | GSE182786   | Older_2         |
| Old_4        | >60        | GSE182786   | Older_3         |
| Old_5        | >60        | GSE182786   | Older_4         |
| Old_6        | >60        | GSE182786   | Older_5         |
| Old_7        | >60        | GSE182786   | Older_6         |
| Old_8        | >60        | GSE182786   | Older_7         |
| Old_9        | >60        | GSE182786   | Older_8         |
