# Supplementary material for: Single-cell transcriptomics identifies senescence-associated secretory phenotype (SASP) features of testicular aging in human
Source: Aging (Albany NY). 2024 Feb 12;16(4):3350–62. doi: 10.18632/aging.205538 (PMC10929807; doi:10.18632/aging.205538)
Supplement: Supplementary Table 2 [file aging-16-205538-s003.xlsx]

## Sheet: Sheet1
Supplementary Table 2. Differentially expressed genes between transcriptome obtained from scRNA-seq.
Gene	p-value	avg_log2FC	adjusted p-value	sig
ID3	0	0.793746	0	up
HMGB4	0	-0.607476	0	down
MRPS15	0	-0.715896	0	down
MACF1	0	0.679938	0	up
TMCO2	0	-0.572351	0	down
NFIA	0	0.542155	0	up
ST6GALNAC3	0	0.695706	0	up
TGFBR3	0	0.603991	0	up
DPYD	0	0.549958	0	up
PALMD	0	0.575065	0	up
GSTM3	0	-0.616291	0	down
UBL4B	0	-0.576395	0	down
TMIGD3	0	-0.547091	0	down
TXNIP	0	1.35741	0	up
OAZ3	0	-0.881354	0	down
S100A6	0	0.722844	0	up
TSACC	0	-0.560629	0	down
KLHDC9	0	-0.503223	0	down
MAEL	0	-0.705266	0	down
LMOD1	0	0.50413	0	up
AKT3	0	0.614793	0	up
SCCPDH	0	-0.654432	0	down
ROCK2	0	0.646956	0	up
NCOA1	0	0.574836	0	up
LTBP1	0	0.516266	0	up
CRIM1	0	0.715877	0	up
EPAS1	0	0.658368	0	up
C2orf73	0	-0.553791	0	down
SPTBN1	0	0.601664	0	up
RPL31	0	-0.637972	0	down
PKP4	0	0.580685	0	up
TFPI	0	0.564249	0	up
BMPR2	0	0.534344	0	up
TNS1	0	0.620432	0	up
OBSL1	0	-0.535822	0	down
PPP1R7	0	-0.514105	0	down
RPL15	0	-0.538375	0	down
RBMS3	0	0.913052	0	up
TGFBR2	0	0.647809	0	up
KRBOX1	0	-0.629769	0	down
NDUFAF3	0	-0.538989	0	down
ZMYND10	0	-0.564562	0	down
SPCS1	0	-0.501277	0	down
PTPRG	0	0.561941	0	up
ADAMTS9	0	0.55626	0	up
ADAMTS9-AS2	0	0.696016	0	up
ROPN1	0	-0.941685	0	down
KALRN	0	0.710301	0	up
ROPN1B	0	-0.685179	0	down
PLSCR4	0	0.511607	0	up
WWTR1	0	0.677702	0	up
MBNL1	0	0.787493	0	up
MECOM	0	0.736363	0	up
FNDC3B	0	0.53558	0	up
MRPL47	0	-0.547061	0	down
RPL39L	0	-0.534824	0	down
LPP	0	0.558462	0	up
LDB2	0	0.998817	0	up
APBB2	0	0.53114	0	up
COX7B2	0	-0.515413	0	down
FRYL	0	0.525224	0	up
SPINK2	0	-0.80592	0	down
IGFBP7	0	0.566287	0	up
GK2	0	-0.526411	0	down
AFF1	0	0.530363	0	up
SPARCL1	0	1.21121	0	up
PDLIM5	0	0.683472	0	up
PPP3CA	0	0.605687	0	up
SYNPO2	0	0.613395	0	up
ARHGAP10	0	0.592264	0	up
SPATA4	0	-0.51124	0	down
CENPU	0	-0.576195	0	down
C5orf49	0	-0.549282	0	down
ROPN1L	0	-0.815047	0	down
FBXL7	0	0.598791	0	up
C7	0	0.600464	0	up
ITGA1	0	0.509029	0	up
ARL15	0	0.830301	0	up
SSBP2	0	0.621575	0	up
MEF2C	0	0.528611	0	up
NME5	0	-0.549957	0	down
CARMN	0	0.622801	0	up
CD74	0	0.624757	0	up
GPX3	0	0.649314	0	up
DUSP1	0	0.625478	0	up
RPL26L1	0	-0.557336	0	down
HLA-E	0	0.852952	0	up
SNHG32	0	-0.659549	0	down
LINC01016	0	-0.636073	0	down
FKBP5	0	0.731103	0	up
MEA1	0	-0.617969	0	down
RCAN2	0	0.539436	0	up
FAM229B	0	-0.570674	0	down
PTPRK	0	0.536903	0	up
TBPL1	0	-0.736927	0	down
UTRN	0	0.553767	0	up
SASH1	0	0.544339	0	up
SYNE1	0	0.577702	0	up
ARID1B	0	0.605482	0	up
QKI	0	0.550938	0	up
ELMO1	0	0.573621	0	up
ZPBP	0	-0.619218	0	down
CT66	0	-0.550785	0	down
PDK4	0	0.630764	0	up
IFT22	0	-0.509697	0	down
IMMP2L	0	0.686566	0	up
DOCK4	0	0.655807	0	up
CAV1	0	0.526756	0	up
ANKRD7	0	-0.681047	0	down
MKLN1	0	0.551198	0	up
CALD1	0	0.518516	0	up
KMT2C	0	0.503609	0	up
RBPMS	0	0.635136	0	up
TACC1	0	0.722767	0	up
CEBPD	0	0.82034	0	up
PENK	0	-0.651821	0	down
PREX2	0	0.5213	0	up
RPL7	0	-0.723204	0	down
NDUFB9	0	-0.522888	0	down
ASAP1	0	0.505976	0	up
NFIB	0	0.726651	0	up
RPS6	0	-0.517039	0	down
TPM2	0	0.726428	0	up
GNAQ	0	0.509632	0	up
AOPEP	0	0.543835	0	up
PPP3R2	0	-0.502549	0	down
GSN	0	0.864763	0	up
STOM	0	0.70858	0	up
NDUFA8	0	-0.558799	0	down
PSMB7	0	-0.632542	0	down
SWI5	0	-0.552469	0	down
C9orf116	0	-0.666076	0	down
SVIL	0	0.517557	0	up
ZEB1	0	0.573592	0	up
ITGB1	0	0.610848	0	up
NRP1	0	0.65246	0	up
PRKG1	0	0.934391	0	up
SRGN	0	0.634007	0	up
LRMDA	0	0.678529	0	up
PTEN	0	0.529255	0	up
ACTA2	0	0.52965	0	up
EXOC6	0	0.602963	0	up
SORBS1	0	0.566275	0	up
DPCD	0	-0.651143	0	down
ABLIM1	0	0.505224	0	up
IFITM2	0	1.10665	0	up
IFITM3	0	1.04344	0	up
CD81	0	0.618936	0	up
RPL27A	0	-0.571921	0	down
LDHC	0	-0.672679	0	down
C11orf96	0	1.00643	0	up
MTCH2	0	-0.5593	0	down
AHNAK	0	0.573137	0	up
BSCL2	0	-0.520979	0	down
CATSPERZ	0	-0.581153	0	down
NEAT1	0	1.15974	0	up
MALAT1	0	1.16204	0	up
FCHSD2	0	0.53001	0	up
PICALM	0	0.639104	0	up
PRSS23	0	0.657941	0	up
ZBTB16	0	0.552116	0	up
TAGLN	0	1.21689	0	up
MCAM	0	0.536995	0	up
FLI1	0	0.535992	0	up
VWF	0	0.954701	0	up
MRPL51	0	-0.625067	0	down
A2M	0	1.06092	0	up
YBX3	0	0.572816	0	up
H2AFJ	0	-0.729422	0	down
MGP	0	1.08836	0	up
EPS8	0	0.600618	0	up
TMTC1	0	0.804947	0	up
PRPH	0	-0.618479	0	down
MED13L	0	0.65697	0	up
TUBA3C	0	-0.56462	0	down
SAP18	0	-0.553037	0	down
MYCBP2	0	0.541837	0	up
DOCK9	0	0.540326	0	up
TEX30	0	-0.677177	0	down
COL4A1	0	0.642448	0	up
COL4A2	0	0.597541	0	up
RTRAF	0	-0.647658	0	down
CDKN3	0	-0.550337	0	down
SYNE2	0	0.771046	0	up
GPHN	0	0.555866	0	up
ZFP36L1	0	0.550439	0	up
ACTN1	0	0.532579	0	up
ANKRD9	0	0.505805	0	up
SIVA1	0	-0.582141	0	down
B2M	0	0.608574	0	up
C15orf48	0	-0.546515	0	down
TCF12	0	0.5812	0	up
GTF2A2	0	-0.678639	0	down
TPM1	0	0.660294	0	up
APH1B	0	-0.519185	0	down
MFGE8	0	0.547692	0	up
NR2F2	0	0.675375	0	up
SPATA8	0	-0.8611	0	down
MRTFB	0	0.513878	0	up
MYH11	0	0.831905	0	up
MT2A	0	1.14696	0	up
MT1E	0	0.681425	0	up
MT1X	0	0.627272	0	up
CMTM2	0	-0.623545	0	down
TRAPPC2L	0	-0.598568	0	down
GABARAP	0	-0.554398	0	down
UBB	0	-0.570242	0	down
IGFBP4	0	0.973379	0	up
PECAM1	0	0.65796	0	up
PITPNC1	0	0.584899	0	up
AMZ2	0	-0.519848	0	down
JPT1	0	-0.535038	0	down
PTPRM	0	0.669874	0	up
RPL17	0	-0.529768	0	down
TCF4	0	0.777537	0	up
IZUMO4	0	-0.836497	0	down
INSR	0	0.548268	0	up
DNAJB1	0	-0.538292	0	down
TPM4	0	0.63851	0	up
KLF2	0	0.696648	0	up
INSL3	0	-1.4095	0	down
JUND	0	0.630451	0	up
LSM4	0	-0.526733	0	down
PDCD5	0	-0.608924	0	down
ACTN4	0	0.55625	0	up
DKKL1	0	-0.618615	0	down
PLCB4	0	0.666658	0	up
ID1	0	0.739246	0	up
MYL9	0	0.662828	0	up
RNF114	0	-0.860579	0	down
SOX18	0	0.588224	0	up
ADAMTS1	0	0.708954	0	up
TCP10L	0	-0.723192	0	down
PSMG1	0	-0.648215	0	down
PDXK	0	-0.576525	0	down
AL133499.1	0	-0.708736	0	down
YBEY	0	-0.594793	0	down
CLDN5	0	0.773865	0	up
DRG1	0	-0.682595	0	down
TIMP3	0	0.816469	0	up
MYH9	0	0.679177	0	up
TEX33	0	-0.526144	0	down
C22orf23	0	-0.524916	0	down
DMD	0	0.764715	0	up
FTX	0	0.706425	0	up
FLNA	0	0.762307	0	up
MT-ATP6	0	0.843133	0	up
MT-CO3	0	0.650927	0	up
MT-ND5	0	0.554566	0	up
MT-CYB	0	0.910309	0	up
MAGI2	1.97248e-296	0.616031	7.21949e-292	up
BUD31	4.90927e-296	-0.531082	1.79684e-291	down
VIM	8.81912e-291	0.541758	3.22788e-286	up
NR2F2-AS1	1.89793e-286	0.558245	6.9466e-282	up
ADIRF	5.78932e-286	0.767548	2.11895e-281	up
PSMG2	1.81802e-285	-0.515546	6.65412e-281	down
PDZRN4	9.86433e-285	1.06138	3.61044e-280	up
IGFBP6	1.43571e-279	0.757171	5.25486e-275	up
MYRIP	1.5916e-276	0.595342	5.82541e-272	up
TMEM99	2.08819e-275	-0.52667	7.64297e-271	down
KLF12	1.41297e-274	0.537475	5.17159e-270	up
CCN2	2.69571e-272	0.543115	9.86655e-268	up
MAPT	2.74038e-269	-0.594005	1.00301e-264	down
MEG8	2.4067e-261	0.653958	8.80876e-257	up
GYG1	4.44857e-261	-0.59717	1.62822e-256	down
HLA-A	4.5793e-257	0.575502	1.67607e-252	up
MIR99AHG	1.12151e-256	0.601987	4.10482e-252	up
DYNLT1	3.41351e-256	-0.541938	1.24938e-251	down
CCL14	3.47371e-249	0.601064	1.27141e-244	up
C5orf58	3.75876e-249	-0.525351	1.37574e-244	down
CKS2	1.35094e-248	-0.569546	4.94456e-244	down
HLA-DRB1	6.68114e-248	0.542285	2.44536e-243	up
TIMP1	2.60778e-246	0.500069	9.54472e-242	up
DLG2	1.31024e-240	0.503479	4.79563e-236	up
IGFBP5	3.13459e-240	0.728247	1.14729e-235	up
MT-CO1	9.10598e-239	0.578251	3.33288e-234	up
MCTP1	1.77416e-237	0.696935	6.49361e-233	up
HMGN2	6.458e-237	-0.529179	2.36369e-232	down
GIHCG	7.56859e-236	-0.64449	2.77018e-231	down
HLA-C	1.62559e-232	0.503971	5.94984e-228	up
LY6K	8.67495e-215	-0.515194	3.17512e-210	down
LAMA2	1.97198e-207	0.759426	7.21764e-203	up
ADGRL4	5.83599e-199	0.619629	2.13603e-194	up
HLA-B	6.92487e-199	0.696502	2.53457e-194	up
RPS26	1.82188e-197	0.63564	6.66827e-193	up
FMR1NB	3.82978e-196	-0.506988	1.40174e-191	down
RPL13A	4.85148e-166	-0.601388	1.77569e-161	down
ANO2	1.5224e-154	0.514963	5.57213e-150	up
TSHZ2	1.13564e-146	0.587154	4.15654e-142	up
ACTB	2.80652e-135	0.720917	1.02721e-130	up
RAN	8.95641e-125	-0.546349	3.27814e-120	down
PIK3R3	1.53684e-101	0.646878	5.62498e-97	up
RGS5	4.19247e-81	0.542535	1.53449e-76	up
RPS17	1.00865e-45	-0.602749	3.69175e-41	down
FOS	8.04738e-37	-0.660662	2.94542e-32	down
CFD	1.84557e-26	-0.726832	6.75498e-22	down
JUN	1.653e-14	-0.582193	6.05013e-10	down
CCDC168	2.30865e-09	0.515185	8.44988e-05	up
	Significance was determined with edgeR Exact Test (two-sided) and p-value adjusted with Benjamini-Hochberg correction (FDR < 0.05). SASP-related genes are highlighted in yellow. Related to Figure 2b.
